# Supplementary material for: SET Domain Group 703 Regulates Planthopper Resistance by Suppressing the Expression of Defense-Related Genes
Source: MDPI journal article supplement (doi:10.3390/ijms241613003), 2023-08-21
Supplement: s1 [file s1]

## Supplementary Materials

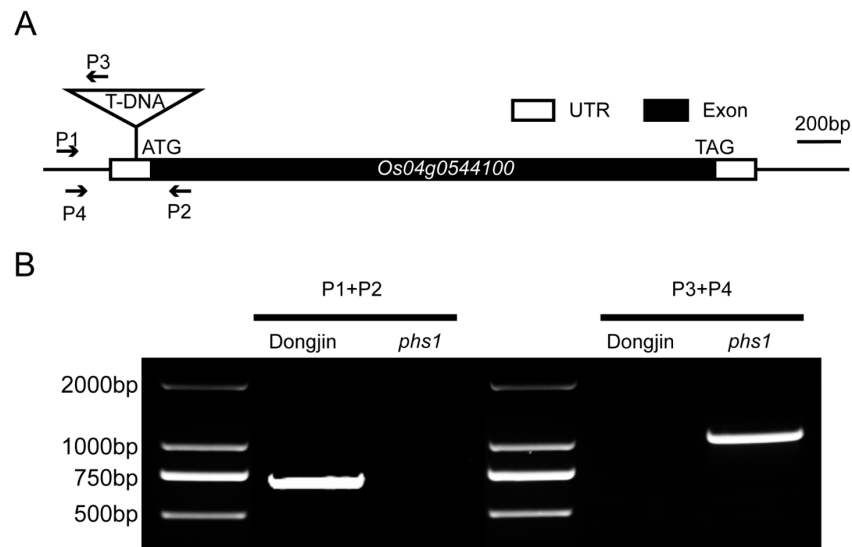

**Figure S1.** Analysis of mutant *phs1*. **(A)** Schematic representation of T-DNA insertion in the mutant *phs1* and the PCR primer position within the *SDG703* gene organization structure. Untranslated region (UTR), chromosome, and exon are represented by the white box, line, and black box, respectively. Forward and reverse PCR primers (labeled arrowed) served in genotyping PCR for Dongjin and mutant *phs1*, translation start codon ATG, and T-DNA insertion (triangle) are indicated in schematic representation. **(B)** T-DNA insertion verity of Dongjin and mutant *phs1* by PCR. Primers 1 and 2 amplified the 684 bp fragment only in Dongjin which have no T-DNA insertion. Primers 3 and 4 amplified the 1165 bp fragment only in mutant *phs1* which have T-DNA insertion.

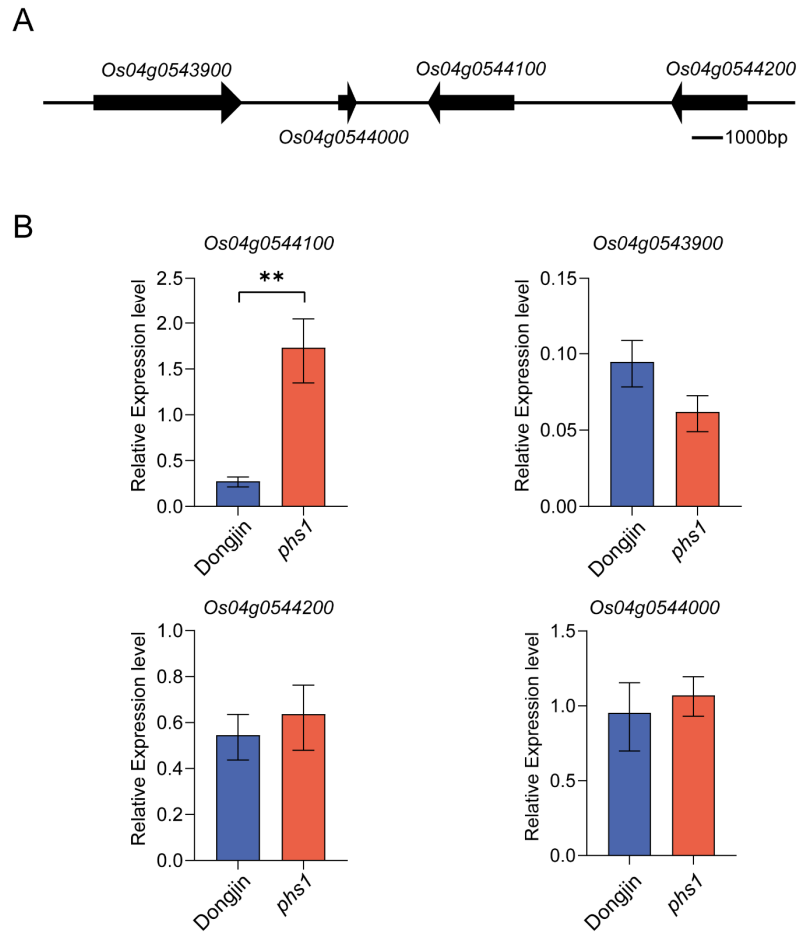

**Figure S2.** RT-qPCR analysis of mutant *phs1*. **(A)** Schematic representation of the arrangement of *SDG703* and its upstream and downstream genes on chromosomes. **(B)** RT-qPCR analysis of *SDG703* and its upstream and downstream genes in wild-type Dongjin and mutant *phs1* grown under normal condition, with *18s-rRNA* as the internal reference gene, n=3. Significant differences were determined using Student's *t*-test. \*\* $P < 0.01$ .

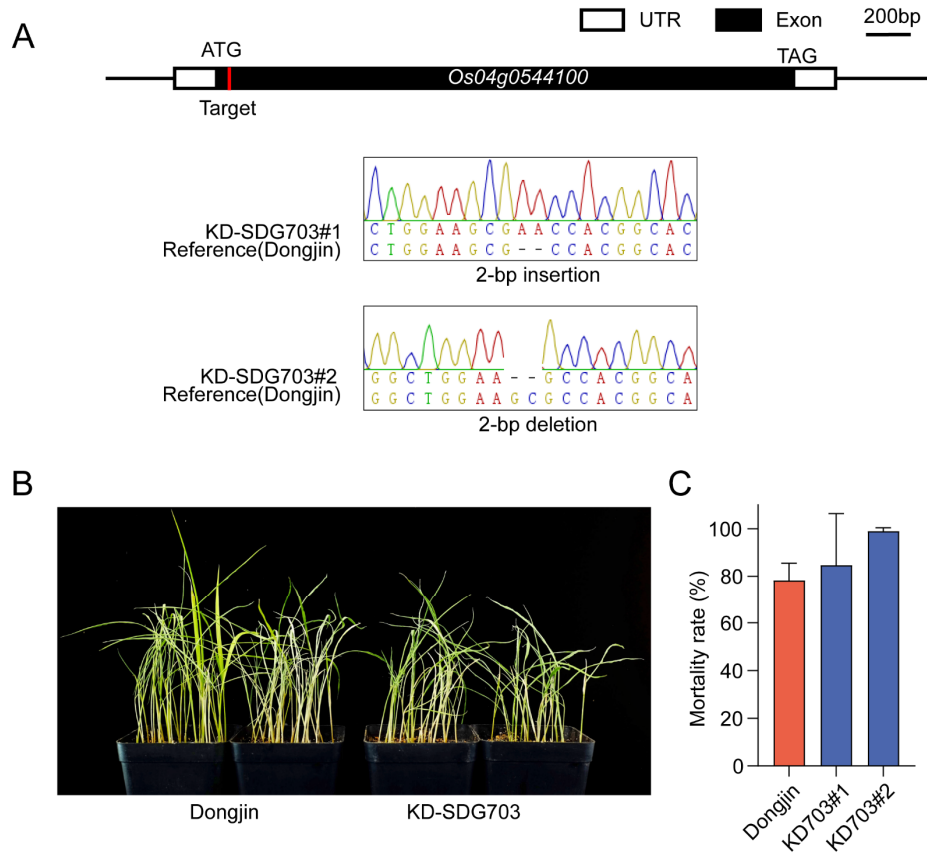

**Figure S3.** SBPH resistance phenotype of SDG703 knock-out transgenics. **(A)** SDG703 knock-out mutant *KD-SDG703* plants were screened by sequencing before being used in this study. The *KD-SDG703#1* harbors a 2-bp insertion in the exon and the *KD-SDG703#2* has a 2-bp deletion in the exon. **(B)** Phenotypes of wild-type and two independent SDG703 knock-out transgenic lines (*KD-SDG703#1*, *KD-SDG703#2*) subjected to SBPH infestation. Bar: 5cm. **(C)** The seeding mortality rate of wild-type and two independent *KD-SDG703* transgenics (n=3). Significant differences were determined using Student's *t*-test.

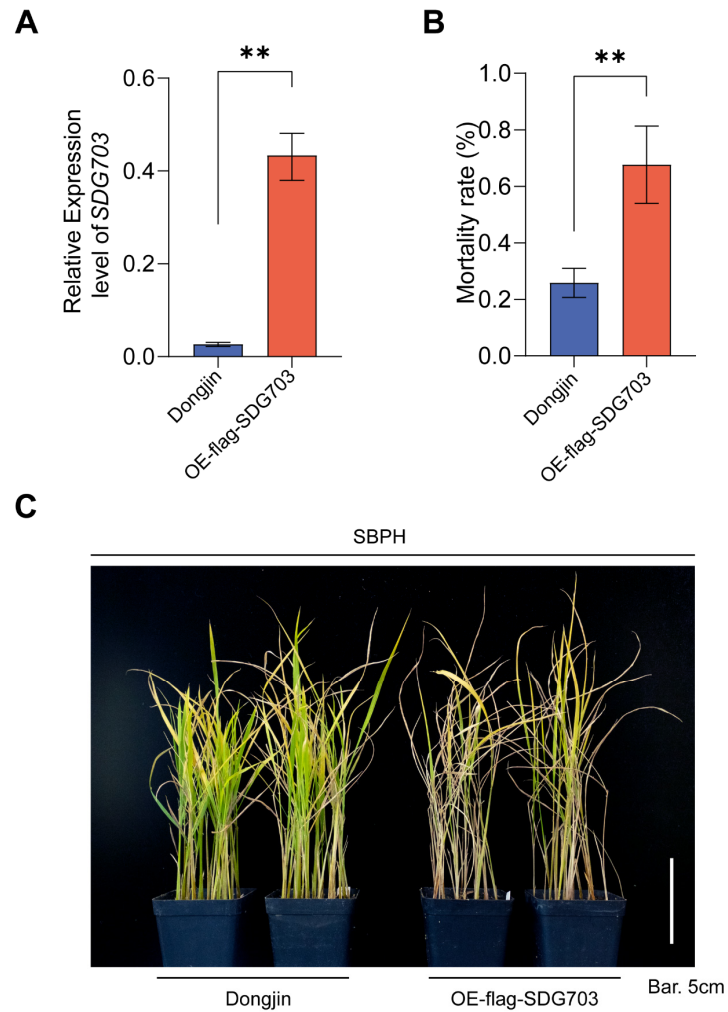

**Figure S4.** SBPH resistance phenotype of *OE-flag-SDG703*. **(A)** RT-qPCR analysis of SDG703 in wild-type Dongjin and *OE-flag-SDG703* grown under normal condition, with *18s-rRNA* as the internal reference gene. n=3. **(B)** Seeding mortality rate of wild-type and *OE-flag-SDG703*. n=3. Significant differences were determined using Student's *t*-test. \*\* $P < 0.01$ . **(C)** Phenotypes of wild-type and transgenic line plants *OE-flag-SDG703* subjected to SBPH infestation. Bar: 5cm.

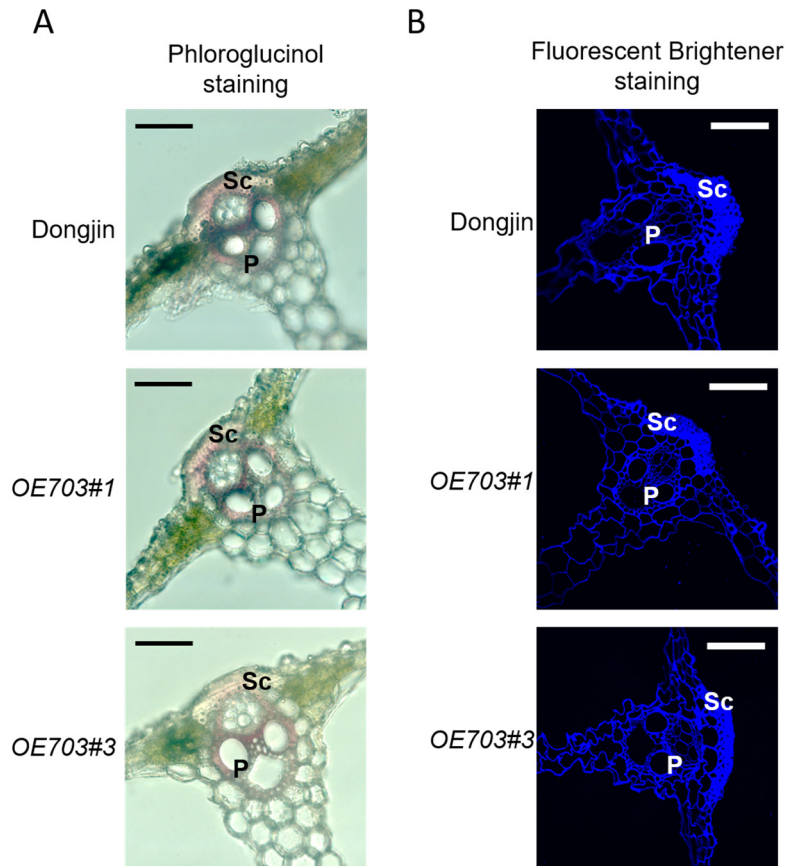

**Figure S5.** SDG703 has no relationship with lignin and cellulose accumulation in rice sheaths. (A) Representative images of lignin accumulation showed by phloroglucinol staining in fresh leaf sheaths of wild-type Dongjin and OE-SDG703. Sc: sclerenchyma; P: phloem. Scale bar: 50  $\mu$ m. (B) Representative images of cellulose accumulation showed by fluorescent brightener staining in the semithin section of leaf sheaths in wild-type and OE-SDG703. Sc: sclerenchyma; P: phloem. Scale bar: 50  $\mu$ m.

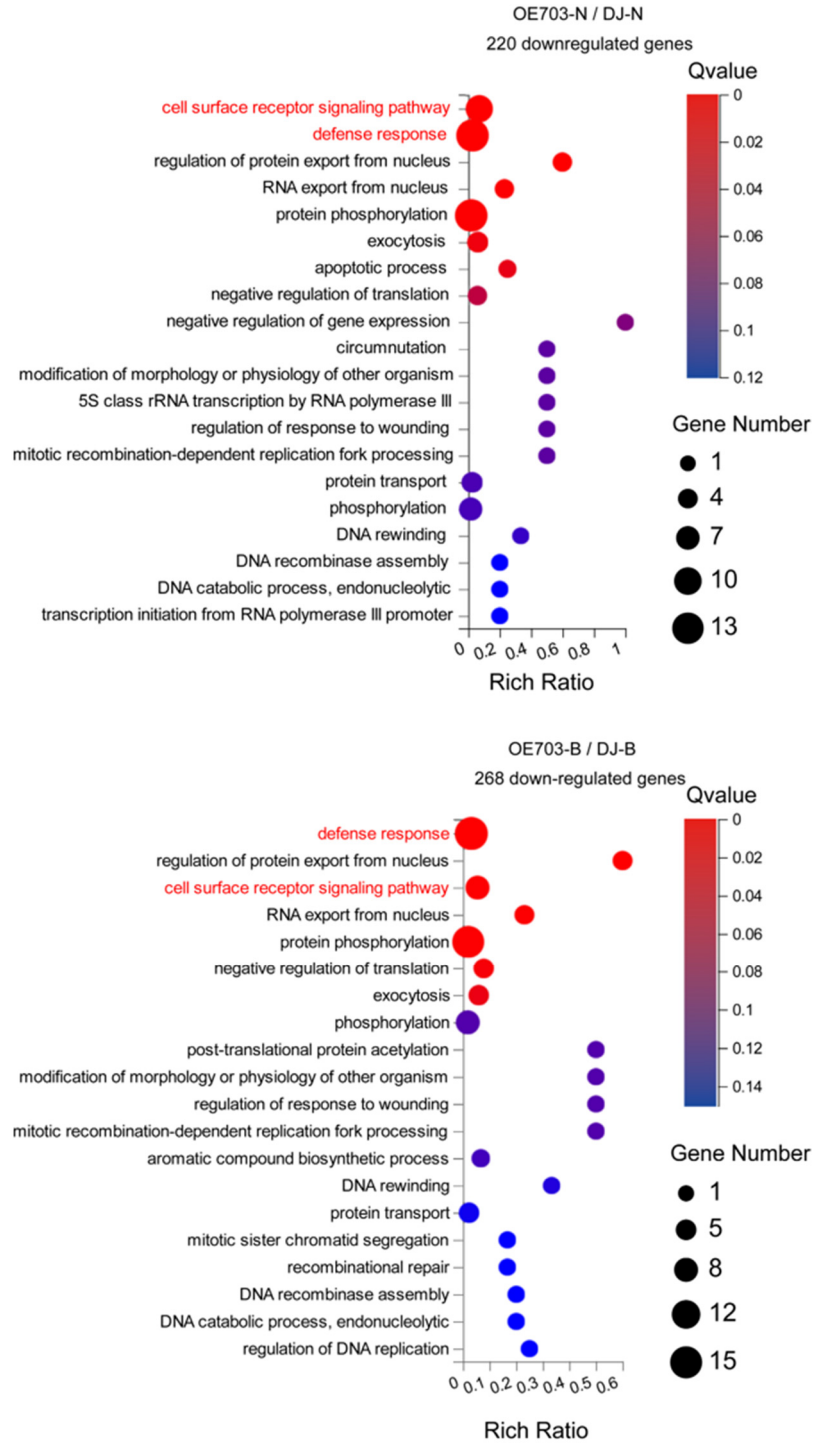

**Figure S6.** Gene ontology (GO) analysis of downregulated genes in *OE-SDG703* lines compared with wild-type Dongjin in normal condition or SBPH infestation. The size of each point represents the number of genes, and Qvalue are indicated with various colors.

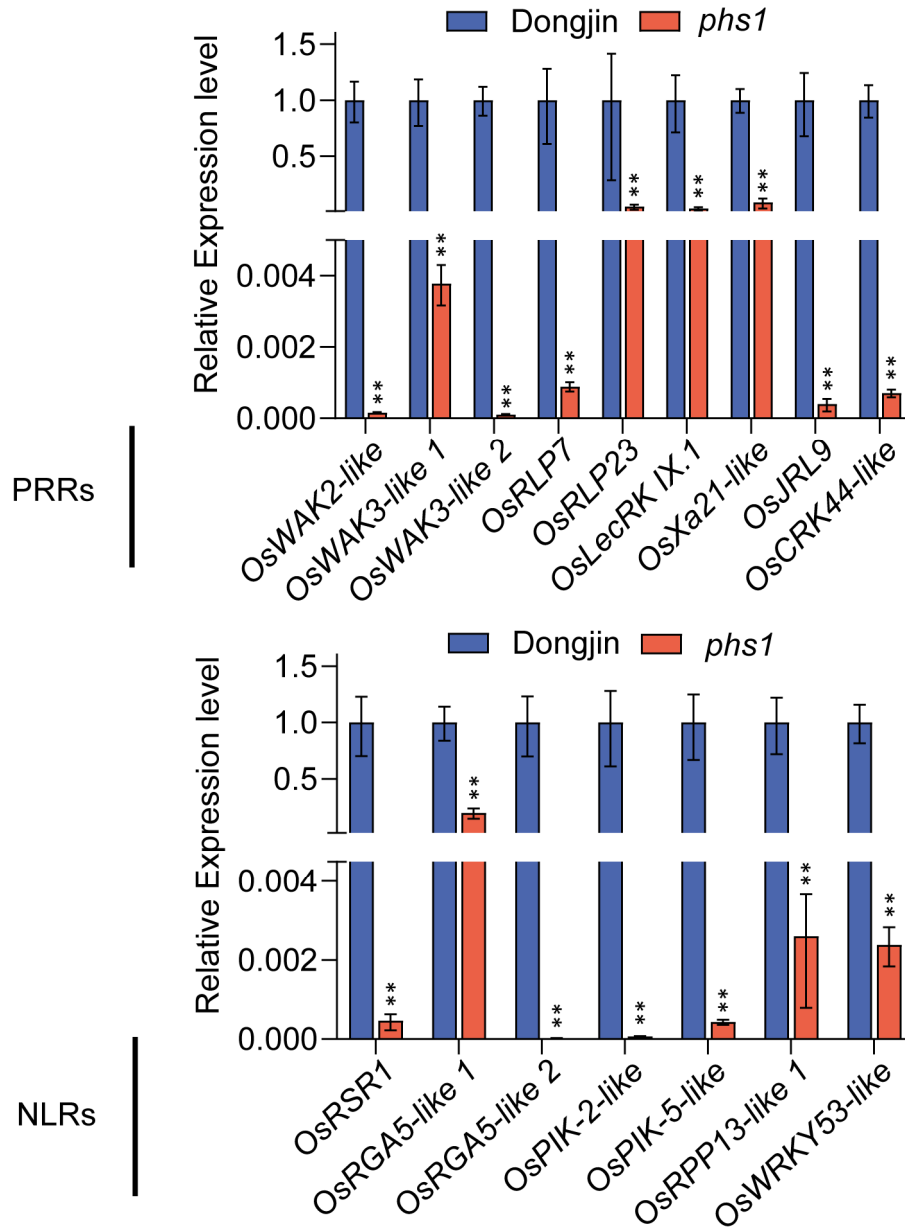

**Figure S7.** Expression analysis of PRR and NLR genes in wild-type and mutant *phs1* with normal condition by RT-qPCR. Values are the means  $\pm$  SD of three individual biological replicates normalized to the internal control *18s-rRNA*. Significant differences were determined using Student's *t*-test. \*\* $P < 0.01$ .

**Table S1.** List of nucleotide sequences of primers used in this study.

| Primer usage                   | Primer name             | Forward primer sequence (5'~3')              | Reverse primer sequence (5'~3')          |
|--------------------------------|-------------------------|----------------------------------------------|------------------------------------------|
| Verification<br>of <i>phs1</i> | P1                      | CAGTCCGACTCCGATCCA                           |                                          |
|                                | P2                      |                                              | CCCTGCCATTCTCAAAC                        |
|                                | P3                      | CCGACTCCGATCCACCAT                           |                                          |
|                                | P4                      |                                              | TCGGCTTCAAATGGCGTA                       |
|                                | flanking-sequence-14509 | TATTGACCCACACTTTGCCGTA                       | CACCAGAAGCCTCTAACCCT                     |
| Vector<br>Construction         | Crispr-SDG703-33        | GGCAAAGCCCGGCTGGAAGCGCCA                     | AAACTGGCGCTTCCAGCCGGGCTT                 |
|                                | pAN580-SDG703           | CGGAGCTAGCTCTAGAATGGGGATCCCGGAGG             | TGCTCACCATGGATCCATACAACCAACCATCA<br>C    |
|                                | pCambia1300-SDG703-Flag | ACGATGATAAGGGCGGTACCATGGGGATCCCG<br>GAGGTG   | TGTAGTCCATGTCGACATACAACCAACCATCA<br>C    |
|                                | pCambia1305-SDG703-GFP  | CGGAGCTAGCTCTAGAATGGGGATCCCGGAGG             | TGCTCACCATGGATCCATACAACCAACCATCA<br>C    |
|                                | pCambia1390-SDG703      | TTACTTCTGCACTAGGTACCATGGGGATCCCG<br>GAGGTGGT | GAATTCCCGGGGATCCCTAATACAACCAACCA<br>TCAC |
|                                | SDG703pro               | GAATTCCCGGGGATCCAAGTCTACTCGCTAGGA<br>ATTTCG  | GGCCAGTGCCAAGCTTCCAACGCCCCCGCAC<br>T     |
| RT-qPCR                        | RT_SDG703               | CCAAGTATCCAGAAAGCTGA                         | TTCTCCTCATCCCACATGAA                     |
|                                | RT_OsGDH2               | CCAAGTATCCAGAAAGCTGA                         | TTCTCCTCATCCCACATGAA                     |
|                                | RT_OsCYCP4              | TACAACAACGCCTACTTCGC                         | CAGTAGTGGCCGAACGTCT                      |
|                                | RT_Os04g45980           | GGCAAGTAAAGTCTGAAACC                         | AGTAGGTAACAAAGCTCAACCA                   |
|                                | 18S-rRNA                | ATGATAACTCGACGGATCGC                         | CTTGGATGTGGTAGCCGTTT                     |
|                                | RT_OsRSR1               | CTTTAAGATGCATGACCTCGTG                       | ACGAACTTCCTTATCCATCCTC                   |
|                                | RT_OsJRL9               | AAACGTGTGAAAGGTACCCTG                        | CATGTGCGTCAACACCTCC                      |



| Primer usage | Primer name     | Forward primer sequence (5'~3') | Reverse primer sequence (5'~3') |
|--------------|-----------------|---------------------------------|---------------------------------|
|              | RT_OsWAK3-L1    | CGAGAAAGGCTGGTACAATTC           | TCAAGTACAGTTGGGACACTTT          |
|              | RT_OsWAK3-L2    | CAACATACTTTGGATATCTGTGC         | TTTTCTGGCAAAACAACCTTC           |
|              | RT_Xa21-L       | CCTTCTTTTGCCAGTATTCGAG          | CAAGTGAGATAGTGTCCGCATA          |
|              | RT_OsRLP7       | GCCATGCTACTCATCCTCGT            | CTACTGCTTCCGTGGAGCTT            |
|              | RT_OsRLP23      | TACCAGTTTACTGCTGCACTAA          | GTCCAAAGACTCAAGGTTGTTC          |
|              | RT_OsLecRK IX.1 | CAGCTGCATTCATGGTATTTCA          | CATCTCGATCTCTACGATGGTC          |
|              | RT_OsCRK44-L    | GCTTGGATGCAAAGATATCAACGA        | CTTTCGGATAACCCGGAGGG            |
|              | RT_OsWAK2-L     | GAAGTTTCGATTGTGTGTGTCA          | GTCGTGTTTTCCGTGATAAGAG          |
|              | RT_OsWRKY53-L   | GATGGTCGACGTCGTATACAAG          | ATACACCGGTAGTAGCATCTTG          |
|              | RT_OsRPP13-L    | ACTCTCTCTTTCCTCCTGTAGT          | CCAACGTAAAGAAGGACAGGA           |
|              | RT_PIK-5-L      | AAATTCCAACCACTAGCCAAAC          | ATTCCAATCTGAATTAGGCCGA          |
|              | RT_Pik-2-L      | GAGGAGATGGAGAGCATGAAC           | GAGTCTACCTTTGGTACGGTG           |
|              | RT_OsRGA5-L1    | ATGTTGATGTTCTCGGAGGATT          | AACTCCAGACAGATGTTTCGATT         |
|              | RT_OsRGA5-L2    | ATGGTTAATTGACAAGTGCCAC          | GCGACATCATCAATCTTGTACC          |
| ChIP-qPCR    | ChIP_WAK3-L-P1  | GCACATTCAAGCAACACCA             | GCATCACTCCTTGTGCCATG            |
|              | ChIP_WAK3-L-P2  | AACCATAGCTTTACCCCTCCC           | TGCCTCCACCGAGATGTCC             |
|              | ChIP_WAK3-L-P3  | GTACCAACTAATGCGTGCC             | CTTTAAATAAGACGGACGGTT           |
|              | ChIP_WAK3-L-P4  | TTACTCTTATAATTTTCGTCCC          | TAGATTAGTATTGCCATCGAC           |
|              | ChIP_WAK3-L-P5  | ATAAGCAAAATCACAGATCGC           | TCCCCTATAGACCTTACCGAA           |
|              | ChIP_Xa21-L-P1  | CAACGCTTATATACCAGGAAC           | CCATAGAAGCATTACGCAGA            |
|              | ChIP_Xa21-L-P2  | TGCCATTTTCAACATGTCTAGCC         | CCCGTCAGATTGTTATTCCAGA          |
|              | ChIP_Xa21-L-P3  | ACAGGACTAATCCCGTCAGG            | AAATTGTCTCAAGATTCTGGC           |
|              | ChIP_Xa21-L-P4  | TTCACAGATTCAATCCCGAAC           | TCCAATACTTCTAAGCTGGTC           |

| Primer usage | Primer name    | Forward primer sequence (5'~3') | Reverse primer sequence (5'~3') |
|--------------|----------------|---------------------------------|---------------------------------|
|              | ChIP_Xa21-L-P5 | TGCTTCAGTATATGCCCAA             | TGTGCAAGTACGTCTCCAA             |
|              | ChIP_RLP7-P1   | CAGGCAATATTGTATCCATG            | AAAGACAAGTTGATAGGCAA            |
|              | ChIP_RLP7-P2   | TCGGTGACTACTCTGCCGCCTT          | CCGTCCCAGCTGCAACAGT             |
|              | ChIP_RLP7-P3   | GCCGCCTCACCAGACTCTCC            | GCTGTACTCGTCGTCCAACCTCCT        |
|              | ChIP_RLP23-P1  | TAGACGTACCTGTGCTTATCCG          | TTTGCAACTCTATGGCACAC            |
|              | ChIP_RLP23-P2  | CGCATTGTTTCAGCCTGACC            | AGATGTCAAGGTACTCCAGC            |
|              | ChIP_RLP23-P3  | TATTGCTCACTTTCTGGTCCG           | ACAACAAGTGATTTCAAGGCAG          |
|              | ChIP_RLP23-P4  | TGCCTTCTTCCATTGGTAAGCTG         | ATCCTACTAGCTCCAACCCAGA          |
|              | ChIP_RLP23-P5  | ATATAACCAGATCAGAGGTGCAA         | TAGCCTGAGGTCTTCCATACCC          |
|              | ChIP_RLP23-P6  | CTGCACTAACATACAAAAGGCAAT        | TGAGACATCAATCAGCACGAG           |
|              | ChIP_JRL9-P1   | GTAAACTACAATCCGTTGCT            | TGACAGCCATTATTTAACCC            |
|              | ChIP_JRL9-P2   | ATGTTGTTTGAATACGACGA            | GTACCTTTCACACGTTTGC             |
|              | ChIP_JRL9-P3   | GTTTTAAATGAACGGACACCT           | TTAGCGCATCATTACTGCAA            |
|              | ChIP_JRL9-P4   | TAACCTGATGCATGGACGCACAC         | CATGTGCGTCAACACCTCCC            |
|              | ChIP_JRL9-P5   | CGGCTACCATGACAACCAC             | TGAACTGCAACCACCGGAT             |
|              | ChIP_RSR1-P1   | AAACCTTTTATAACGGAGCAT           | ATGTCCATATGTGTTCCGTA            |
|              | ChIP_RSR1-P2   | CGGAGATTTGAGGCTAGTGGA           | GGCGAGAGACGACCAGAGTA            |
|              | ChIP_RSR1-P3   | TCCCTCCTCTTTGGGCTGA             | ACATATTATATGCCACGGTCGAA         |
|              | ChIP_RSR1-P4   | ATATTTCTAAAATGACCAGCAG          | TCCAAAGATTGTATCGCTTG            |
|              | ChIP_RSR1-P5   | AATCCAGAACTGATATCGC             | CAATTTGACCGTATTTACACC           |
|              | ChIP_RSR1-P6   | CGTATGCCTGATGTAAACCAC           | ACCTAAGAGACTCAATGCCTT           |
|              | OsUBQ10-A      | TCAGGATACGTGTGCTGTTACTACC       | ACAGCAAACATATTCCAACAGAACA       |
|              | OsUBQ10-B      | GATGGCAGGACCCTTGCTGACTA         | CTGGATCTTGGCCTTGACGTTGT         |

**Table S2.** Fifty three candidate genes in Venn diagram

| Gene Symbol  | Chr.  | DJ_N<br>Average<br>FPKM | DJ_B<br>Average<br>FPKM | OE703_N<br>Average<br>FPKM | OE703_B<br>Average<br>FPKM | GeneBank Desc                                                        |
|--------------|-------|-------------------------|-------------------------|----------------------------|----------------------------|----------------------------------------------------------------------|
| LOC4343276   | chr7  | 1.31                    | 6.16                    | 0.09                       | 0.16                       | ATP-dependent DNA helicase SRS2-like protein At4g25120               |
| LOC4351801   | chr12 | 1.46                    | 4.48                    | 0.00                       | 0.00                       | chitinase-like protein 1                                             |
| LOC4335481   | chr4  | 7.91                    | 19.57                   | 0.10                       | 0.42                       | cysteine-rich receptor-like protein kinase 6                         |
| LOC4350071   | chr11 | 1.91                    | 8.04                    | 0.00                       | 0.00                       | dirigent protein 1                                                   |
| LOC4351960   | chr12 | 2.35                    | 11.94                   | 0.14                       | 1.00                       | disease resistance protein Pik-2-like                                |
| LOC4350850   | chr11 | 5.37                    | 10.74                   | 0.00                       | 0.00                       | disease resistance protein Pik-2-like                                |
| LOC107278320 | chr11 | 0.55                    | 1.55                    | 0.00                       | 0.00                       | disease resistance protein PIK5-NP-like                              |
| LOC112936146 | chr11 | 9.76                    | 26.29                   | 1.01                       | 1.61                       | disease resistance protein RGA5-like                                 |
| LOC9267585   | chr11 | 11.13                   | 26.25                   | 0.00                       | 0.00                       | disease resistance protein RGA5-like                                 |
| LOC4350133   | chr11 | 5.18                    | 23.70                   | 0.01                       | 0.01                       | disease resistance protein RPM1                                      |
| LOC4338575   | chr5  | 0.30                    | 1.05                    | 0.00                       | 0.01                       | exocyst complex component EXO70B2                                    |
| LOC4343472   | chr7  | 1.48                    | 4.13                    | 0.09                       | 0.14                       | F-box protein At5g07610                                              |
| LOC4352868   | chr12 | 246.54                  | 2406.69                 | 54.60                      | 381.62                     | glycine-rich RNA-binding protein 2                                   |
| LOC4335495   | chr4  | 18.62                   | 46.99                   | 0.00                       | 0.00                       | jacalin-related lectin 9                                             |
| LOC4344556   | chr8  | 0.93                    | 3.84                    | 0.05                       | 0.01                       | L-type lectin-domain containing receptor kinase IX.1                 |
| LOC4350701   | chr11 | 2.69                    | 7.02                    | 0.30                       | 1.01                       | maf-like protein DDB_G0281937                                        |
| LOC9271010   | chr12 | 1.44                    | 4.99                    | 0.02                       | 0.02                       | phosphoglycolate phosphatase 1B, chloroplastic                       |
| LOC4351165   | chr11 | 1.18                    | 11.52                   | 0.27                       | 0.44                       | probable LRR receptor-like serine/threonine-protein kinase At3g47570 |
| LOC107279538 | chr11 | 0.08                    | 0.39                    | 0.00                       | 0.00                       | probable LRR receptor-like serine/threonine-protein kinase At3g47570 |
| LOC9272184   | chr12 | 4.59                    | 11.51                   | 0.00                       | 0.00                       | probable staphylococcal-like nuclease CAN4                           |
| LOC107276072 | chr11 | 12.32                   | 36.34                   | 0.19                       | 0.00                       | probable WRKY transcription factor 53                                |

| Gene Symbol  | Chr.  | DJ_N<br>Average<br>FPKM | DJ_B<br>Average<br>FPKM | OE703_N<br>Average<br>FPKM | OE703_B<br>Average<br>FPKM | GeneBank Desc                                    |
|--------------|-------|-------------------------|-------------------------|----------------------------|----------------------------|--------------------------------------------------|
| LOC107281147 | chr5  | 2.77                    | 5.70                    | 0.30                       | 1.06                       | protein FAR1-RELATED SEQUENCE 5                  |
| LOC9268622   | chr1  | 0.83                    | 2.32                    | 0.01                       | 0.00                       | putative disease resistance RPP13-like protein 1 |
| LOC4345291   | chr8  | 0.87                    | 2.70                    | 0.01                       | 0.04                       | putative F-box/LRR-repeat protein At5g41630      |
| LOC4335588   | chr4  | 2.43                    | 5.64                    | 0.02                       | 0.75                       | putative receptor-like protein kinase At4g00960  |
| LOC107279563 | chr12 | 0.18                    | 1.09                    | 0.02                       | 0.14                       | receptor like protein 23                         |
| LOC4351803   | chr12 | 0.51                    | 3.92                    | 0.00                       | 0.00                       | receptor-like protein 7                          |
| LOC4351209   | chr11 | 2.78                    | 8.62                    | 0.43                       | 1.93                       | selenoprotein H                                  |
| LOC4328654   | chr2  | 12.89                   | 28.15                   | 0.64                       | 2.42                       | SPX domain-containing protein 2-like             |
| LOC4350688   | chr11 | 23.56                   | 48.83                   | 1.89                       | 3.35                       | ubiquitin carboxyl-terminal hydrolase 18         |
| LOC107276434 | chr12 | 0.61                    | 4.96                    | 0.00                       | 0.00                       | uncharacterized LOC107276434                     |
| LOC107277588 | chr2  | 0.09                    | 0.44                    | 0.00                       | 0.00                       | uncharacterized LOC107277588                     |
| LOC4329988   | chr2  | 3.03                    | 9.52                    | 0.00                       | 0.00                       | uncharacterized LOC4329988                       |
| LOC4335494   | chr4  | 0.41                    | 1.95                    | 0.00                       | 0.11                       | uncharacterized LOC4335494                       |
| LOC4338795   | chr5  | 0.22                    | 1.05                    | 0.02                       | 0.04                       | uncharacterized LOC4338795                       |
| LOC4340728   | chr6  | 3.09                    | 11.23                   | 0.00                       | 0.00                       | uncharacterized LOC4340728                       |
| LOC4342178   | chr7  | 1.47                    | 4.92                    | 0.00                       | 0.00                       | uncharacterized LOC4342178                       |
| LOC4343370   | chr7  | 0.42                    | 1.50                    | 0.01                       | 0.01                       | uncharacterized LOC4343370                       |
| LOC4350122   | chr11 | 0.69                    | 2.21                    | 0.00                       | 0.00                       | uncharacterized LOC4350122                       |
| LOC4350599   | chr11 | 9.84                    | 20.63                   | 1.63                       | 3.34                       | uncharacterized LOC4350599                       |
| LOC4351136   | chr11 | 3.70                    | 13.33                   | 0.39                       | 0.43                       | uncharacterized LOC4351136                       |
| LOC4351893   | chr12 | 18.76                   | 47.06                   | 0.00                       | 0.02                       | uncharacterized LOC4351893                       |
| LOC4352075   | chr12 | 4.69                    | 14.20                   | 0.01                       | 0.00                       | uncharacterized LOC4352075                       |

| Gene Symbol  | Chr.  | DJ_N    | DJ_B    | OE703_N | OE703_B | GeneBank Desc                     |
|--------------|-------|---------|---------|---------|---------|-----------------------------------|
|              |       | Average | Average | Average | Average |                                   |
|              |       | FPKM    | FPKM    | FPKM    | FPKM    |                                   |
| LOC4352102   | chr12 | 10.28   | 23.99   | 0.03    | 0.05    | uncharacterized LOC4352102        |
| LOC9266148   | chr12 | 1.94    | 6.79    | 0.00    | 0.00    | uncharacterized LOC9266148        |
| LOC9266760   | chr11 | 1.01    | 3.80    | 0.00    | 0.00    | uncharacterized LOC9266760        |
| LOC9267533   | chr11 | 2.44    | 5.89    | 0.02    | 0.03    | uncharacterized LOC9267533        |
| LOC9270995   | chr5  | 0.27    | 1.95    | 0.07    | 0.20    | uncharacterized LOC9270995        |
| LOC9272159   | chr10 | 3.64    | 13.49   | 0.01    | 0.01    | uncharacterized LOC9272159        |
| LOC4350669   | chr11 | 1.01    | 3.45    | 0.00    | 0.00    | UPF0481 protein At3g47200         |
| LOC9272252   | chr4  | 2.24    | 5.54    | 0.00    | 0.00    | wall-associated receptor kinase 2 |
| LOC107278106 | chr4  | 7.00    | 14.69   | 0.05    | 0.14    | wall-associated receptor kinase 3 |
| LOC107276842 | chr11 | 1.31    | 14.51   | 0.00    | 0.01    | wall-associated receptor kinase 3 |

**Table S3.** List of differentially expressed genes (DEGs) in *SDG703-OE* vs. Dongjin which was selected for validation by RT-qPCR.

|      | Gene Symbol  | RAP_Locus           | GeneBank Desc                                                        |
|------|--------------|---------------------|----------------------------------------------------------------------|
| PRRs | LOC107276842 | <i>Os11g0690332</i> | wall-associated receptor kinase 3                                    |
|      | LOC4351165   | <i>Os11g0692500</i> | probable LRR receptor-like serine/threonine-protein kinase At3g47570 |
|      | LOC4351803   | <i>Os12g0222900</i> | receptor-like protein 7                                              |
|      | LOC107279563 | <i>Os12g0221700</i> | receptor like protein 23                                             |
|      | LOC4344556   | <i>Os08g0124100</i> | L-type lectin-domain containing receptor kinase IX.1                 |
|      | LOC4335495   | <i>Os04g0330200</i> | jacalin-related lectin 9                                             |
|      | LOC4335481   | <i>Os04g0322100</i> | cysteine-rich receptor-like protein kinase 6                         |
|      | LOC9272252   | <i>Os04g0370100</i> | wall-associated receptor kinase 2                                    |
|      | LOC4335588   | <i>Os04g0369033</i> | putative receptor-like protein kinase At4g00960                      |
|      | LOC107278106 | <i>Os04g0367000</i> | wall-associated receptor kinase 3                                    |
| NLRs | LOC4350133   | <i>Os11g0229500</i> | disease resistance protein RPM1                                      |
|      | LOC107276072 | <i>Os11g0685700</i> | probable WRKY transcription factor 53                                |
|      | LOC107278320 | <i>Os11g0689000</i> | disease resistance protein PIK5-NP-like                              |
|      | LOC9268622   | <i>Os01g0781600</i> | putative disease resistance RPP13-like protein 1                     |
|      | LOC112936146 | <i>Os11g0685600</i> | disease resistance protein RGA5-like                                 |
|      | LOC9267585   | <i>Os11g0588600</i> | disease resistance protein RGA5-like                                 |
|      | LOC4350850   | <i>Os11g0598300</i> | disease resistance protein Pik-2-like                                |
